# Supplementary material
Source: Springer Nature journal article supplement (https://www.springermedizin.de/resource/supplementary/12955_2010_748_MOESM5_ESM.pdf/9560910)
Supplement: MOESM5 [file 9560910]

Study

Weight (random)  
%

Lawrence (New Zealand)

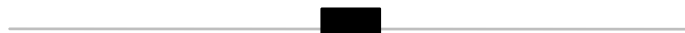

Lahti (Finland)

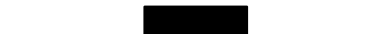

Summary effect

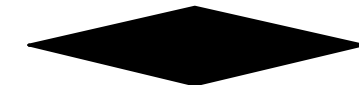

OR

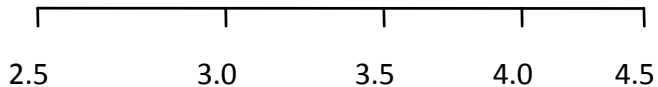

Comparison

Incomplete vs. complete dentition (Lawrence) and  
 $\leq 24$  vs.  $\geq 25$  teeth (Lahti)
